# Supplementary material for: Electrical transport properties of In-doped Ce1−xInxO2−δ (x = 0.1; 0.2)
Source: Royal Society of Chemistry journal article supplement (doi:10.1039/b910335j), 2009-01-01
Supplement: b910335j.pdf [file b910335j.pdf]

## Electrical Transport Properties of In-doped $\text{Ce}_{1-x}\text{In}_x\text{O}_{2-\delta}$ ( $x = 0.1; 0.2$ )

Surinderjit Singh Bhella, Lisa M. Kuti, Qin Li and Venkataraman Thangadurai\*  
 Department of Chemistry, University of Calgary, 2500 University Dr NW, Calgary,  
 Alberta, T2N 1N4 Canada, \* For correspondence Email: [vthangad@ucalgary.ca](mailto:vthangad@ucalgary.ca);

Phone 001 403 210 8649; Fax. 001 403 289 9488

### Supporting Information

**Table S1** Fitting Parameters of Impedance Plots of  $\text{Ce}_{0.8}\text{In}_{0.2}\text{O}_{1.9}$  in the Temperature Range 400-700 °C at Various Atmospheres.

| Atmosphere   | T<br>(°C) | $\rho_b$<br>( $\Omega$ cm) | $\text{CPE}_b$<br>( $\text{F}/\text{cm}^2$ ) | n    | $\rho_{gb}$<br>( $\Omega$ cm) | $\text{CPE}_{gb}$<br>( $\text{F}/\text{cm}^2$ ) | n    |
|--------------|-----------|----------------------------|----------------------------------------------|------|-------------------------------|-------------------------------------------------|------|
| air          | 400       | $9.21 \times 10^6$         | $3.30 \times 10^{-10}$                       | 0.75 | $9.87 \times 10^6$            | $1.20 \times 10^{-9}$                           | 0.55 |
|              | 450       | $9.93 \times 10^6$         | $6.61 \times 10^{-10}$                       | 0.71 | $2.46 \times 10^6$            | $7.09 \times 10^{-8}$                           | 0.56 |
|              | 500       | $1.56 \times 10^6$         | $9.05 \times 10^{-10}$                       | 0.70 | $6.46 \times 10^5$            | $2.15 \times 10^{-8}$                           | 0.69 |
|              | 550       | $8.91 \times 10^5$         | $9.79 \times 10^{-10}$                       | 0.73 | $4.38 \times 10^5$            | $1.54 \times 10^{-7}$                           | 0.49 |
| $\text{N}_2$ | 400       | $3.94 \times 10^7$         | $3.08 \times 10^{-10}$                       | 0.76 | $1.22 \times 10^7$            | $3.48 \times 10^{-8}$                           | 0.56 |
|              | 450       | $9.99 \times 10^6$         | $3.77 \times 10^{-10}$                       | 0.77 | $4.03 \times 10^6$            | $6.90 \times 10^{-8}$                           | 0.56 |
|              | 500       | $2.13 \times 10^6$         | $4.75 \times 10^{-10}$                       | 0.77 | $9.75 \times 10^5$            | $1.29 \times 10^{-8}$                           | 0.53 |
|              | 550       | $6.10 \times 10^5$         | $6.03 \times 10^{-10}$                       | 0.77 | $3.09 \times 10^5$            | $2.03 \times 10^{-7}$                           | 0.51 |
|              | 600       | $1.02 \times 10^5$         | $3.61 \times 10^{-10}$                       | 0.86 | $1.63 \times 10^5$            | $1.34 \times 10^{-7}$                           | 0.47 |
|              | 650       | $1.40 \times 10^4$         | $2.84 \times 10^{-10}$                       | 0.96 | $7.78 \times 10^4$            | $8.61 \times 10^{-8}$                           | 0.48 |
| Ar           | 700       | $4.12 \times 10^3$         | $4.55 \times 10^{-9}$                        | 0.87 | $2.74 \times 10^4$            | $2.19 \times 10^{-7}$                           | 0.42 |
|              | 450       | $9.27 \times 10^6$         | $3.93 \times 10^{-10}$                       | 0.77 | $3.74 \times 10^6$            | $6.83 \times 10^{-8}$                           | 0.55 |
|              | 500       | $1.99 \times 10^6$         | $5.10 \times 10^{-10}$                       | 0.77 | $7.90 \times 10^5$            | $2.14 \times 10^{-7}$                           | 0.50 |
|              | 550       | $6.04 \times 10^5$         | $6.12 \times 10^{-10}$                       | 0.77 | $3.11 \times 10^5$            | $1.99 \times 10^{-7}$                           | 0.51 |
|              | 600       | $1.51 \times 10^5$         | $5.56 \times 10^{-10}$                       | 0.81 | $1.56 \times 10^5$            | $1.70 \times 10^{-7}$                           | 0.47 |
|              | 650       | $2.15 \times 10^4$         | $6.94 \times 10^{-10}$                       | 0.87 | $7.24 \times 10^4$            | $1.40 \times 10^{-7}$                           | 0.45 |
|              | 700       | $6.94 \times 10^3$         | $7.02 \times 10^{-9}$                        | 0.76 | $2.75 \times 10^4$            | $1.46 \times 10^{-7}$                           | 0.47 |

$\rho_b$  and  $\text{CPE}_b$  represent resistivity and constant phase element due to high-frequency part, respectively;  $\rho_{gb}$  and  $\text{CPE}_{gb}$  represent resistivity and constant phase element due to low frequency semicircle, respectively; and n value shows deviation of pure capacitance (for ideal capacitor n has value of unity).
